# Supplementary material
Source: publisher figshare collection journal article supplement (https://gsajournals.figshare.com/ndownloader/files/18720722)
Supplement: Supplementary file 1 [file 18720722]

## Sheet: Sheet1
									Hairless 1		Hairless2		Dam		Coated1		Coated2		Coated3
Chrom.	Name	Position	Reference	Alternate	Gene or gene locus	Region	Effect	Mutation	genotype	allele depth	genotype	allele depth	genotype	allele depth	genotype	allele depth	genotype	allele depth	genotype	allele depth
chr6	chr6:6206309	6206309	T	Tins49	EIF4H-LIMK1	intergenic_region	MODIFIER	.	Tins49 Tins49	0,2	Tins49 Tins49	0,2	T Tins49	19,2	T Tins49	13,3	T T	34,0	T Tins49	29,5
chr6	chr6:67668901	67668901	A	G	ENSCAFG00000036724	downstream_gene_variant	MODIFIER	.	G G	0,46	G G	0,42	A G	25,22	A G	11,21	A G	17,23	A A	34,0
chr6	chr6:67684952	67684952	G	A	ENSCAFG00000036724-ENSCAFG00000034601	intergenic_region	MODIFIER	.	A A	0,64	A A	0,38	G A	21,24	G A	16,22	G A	23,19	G G	40,0
chr6	chr6:67751750	67751750	C	G	ENSCAFG00000036724-ENSCAFG00000034601	intergenic_region	MODIFIER	.	G G	0,57	G G	0,42	C G	21,33	C G	17,26	C G	21,33	C C	39,0
chr6	chr6:67787328	67787328	A	G	ENSCAFG00000036724-ENSCAFG00000034601	intergenic_region	MODIFIER	.	G G	0,61	G G	0,37	A G	27,28	A G	18,14	A G	26,14	A A	40,0
chr6	chr6:67861812	67861812	A	G	ENSCAFG00000036724-ENSCAFG00000034601	intergenic_region	MODIFIER	.	G G	0,47	G G	0,48	A G	15,25	A G	17,23	A G	24,24	A A	36,0
chr6	chr6:68004300	68004300	G	T	ENSCAFG00000034601-ADGRL4	intergenic_region	MODIFIER	.	T T	0,51	T T	1,44	G T	16,23	G T	16,19	G T	18,21	G G	37,0
chr6	chr6:68093330	68093330	C	T	ADGRL4	intron_variant	MODIFIER	.	T T	0,63	T T	0,52	C T	25,26	C T	17,23	C T	25,18	C C	44,0
chr6	chr6:68115824	68115824	A	G	ADGRL4	intron_variant	MODIFIER	.	G G	0,59	G G	0,53	A G	26,17	A G	28,24	A G	19,30	A A	50,0
chr6	chr6:68202262	68202262	CTA	C	ADGRL4-ENSCAFG00000032867	intergenic_region	MODIFIER	.	C C	0,43	C C	0,40	CTA C	28,29	CTA C	16,18	CTA C	22,17	CTA CTA	43,0
chr6	chr6:68668912	68668912	GATTA	G	ENSCAFG00000035607-ENSCAFG00000020810	intergenic_region	MODIFIER	.	G G	0,40	G G	0,59	GATTA G	21,26	GATTA G	18,10	GATTA G	19,17	GATTA GATTA	38,0
chr6	chr6:69264084	69264084	T	A	ZZZ3	intron_variant	MODIFIER	.	A A	0,45	A A	0,49	T A	29,24	T A	20,14	T A	24,30	T T	36,0
chr12	chr12:2682057	2682057	G	T	RING1-VPS52	intergenic_region	MODIFIER	.	T T	0,45	T T	0,26	G T	27,18	G T	17,21	G T	33,23	G T	35,31
chr12	chr12:3141547	3141547	G	A	MLN	intron_variant	MODIFIER	.	A A	0,42	A A	0,40	G A	15,15	G A	14,19	G A	28,27	G A	26,23
chr12	chr12:8864123	8864123	G	T	ENSCAFG00000001568-ENSCAFG00000001571	intergenic_region	MODIFIER	.	T T	0,27	T T	0,24	G T	10,16	G G	19,0	G T	12,14	G T	12,22
chr12	chr12:9402394	9402394	C	A	ENSCAFG00000035155	intron_variant	MODIFIER	.	A A	0,65	A A	0,43	C A	16,28	C A	26,22	C A	17,25	C A	24,25
chr12	chr12:29106552	29106552	G	T	ENSCAFG00000032797-ENSCAFG00000025981	intergenic_region	MODIFIER	.	T T	0,42	T T	0,42	G T	20,24	G G	35,0	G G	40,0	G T	22,22
chr13	chr13:16784223	16784223	G	A	SLC30A8-MED30	intergenic_region	MODIFIER	.	A A	0,61	A A	0,45	G A	27,27	G G	37,0	G A	21,26	G A	29,23
chr13	chr13:17294400	17294400	G	T	EXT1	intron_variant	MODIFIER	.	T T	0,60	T T	0,50	G T	27,8	G G	36,0	G T	28,21	G T	13,27
chr13	chr13:17486072	17486072	C	T	EXT1-SAMD12	intergenic_region	MODIFIER	.	T T	0,56	T T	0,37	C T	21,21	C C	39,0	C T	21,16	C T	26,16
chr13	chr13:17572645	17572645	C	G	EXT1-SAMD12	intergenic_region	MODIFIER	.	G G	0,39	G G	0,43	C G	20,20	C C	35,0	C G	21,17	C G	24,28
chr20	chr20:7598991	7598991	A	AT	SLC6A11-ENSCAFG00000033224	intergenic_region	MODIFIER	.	AT AT	0,12	AT AT	1,10	A AT	20,15	A AT	11,3	A A	26,0	A AT	14,9
chr20	chr20:8078120	8078120	A	G	SEC13	downstream_gene_variant	MODIFIER	.	G G	0,26	G G	0,23	A G	11,9	A G	20,17	A A	36,0	A G	27,8
chr20	chr20:15634289	15634289	C	T	ENSCAFG00000033124-CNTN6	intergenic_region	MODIFIER	.	T T	0,47	T T	0,57	C T	26,33	C T	17,9	C C	46,0	C T	21,23
chr20	chr20:16195728	16195728	T	C	CNTN6-ENSCAFG00000029305	intergenic_region	MODIFIER	.	C C	0,56	C C	0,51	T C	11,26	T C	30,16	T T	37,0	T C	32,26
chr20	chr20:16444934	16444934	T	C	ENSCAFG00000029305-ENSCAFG00000036207	intergenic_region	MODIFIER	.	C C	0,52	C C	0,47	T C	21,22	T C	17,15	T T	34,0	T C	29,23
chr20	chr20:17315354	17315354	T	A	ENSCAFG00000006312-ENSCAFG00000038114	intergenic_region	MODIFIER	.	A A	0,63	A A	0,52	T A	29,27	T A	18,21	T T	40,0	T A	29,27
chr20	chr20:17735101	17735101	G	C	CNTN3	intron_variant	MODIFIER	.	C C	0,67	C C	0,42	G C	27,31	G C	37,23	G G	37,0	G C	30,25
chr20	chr20:18002356	18002356	G	A	CNTN3	intron_variant	MODIFIER	.	A A	0,46	A A	0,39	G A	23,35	G A	20,17	G G	39,0	G A	21,26
chr20	chr20:18978394	18978394	G	A	PDZRN3-PPP4R2	intergenic_region	MODIFIER	.	A A	0,63	A A	0,49	G A	16,22	G A	21,31	G G	35,0	G A	33,30
chr20	chr20:19263171	19263171	AAAATAT	A	GXYLT2	intron_variant	MODIFIER	.	A A	0,47	A A	0,45	AAAATAT A	20,29	AAAATAT A	17,20	AAAATAT AAAATAT	42,0	AAAATAT A	35,26
chr20	chr20:19263934	19263934	C	G	GXYLT2	intron_variant	MODIFIER	.	G G	0,56	G G	0,40	C G	23,13	C G	17,27	C C	42,0	C G	31,25
chr20	chr20:19264116	19264116	T	TTTTA	GXYLT2	intron_variant	MODIFIER	.	TTTTA TTTTA	0,50	TTTTA TTTTA	0,49	T TTTTA	22,19	T TTTTA	16,19	T T	40,0	T TTTTA	22,27
chr20	chr20:19264231	19264231	G	A	GXYLT2	intron_variant	MODIFIER	.	A A	0,46	A A	0,45	G A	27,18	G A	18,16	G G	40,0	G A	35,20
chr20	chr20:19283692	19283692	TACTC	T	GXYLT2-SHQ1	intergenic_region	MODIFIER	.	T T	0,60	T T	0,41	TACTC T	22,19	TACTC T	13,23	TACTC TACTC	38,0	TACTC T	25,22
chr20	chr20:19301005	19301005	G	A	SHQ1	upstream_gene_variant	MODIFIER	.	A A	0,35	A A	0,44	G A	21,21	G A	20,16	G G	38,0	G A	32,14
chr20	chr20:19346062	19346062	G	A	SHQ1	intron_variant	MODIFIER	.	A A	0,46	A A	0,61	G A	19,34	G A	27,19	G G	39,0	G A	19,35
chr20	chr20:19400976	19400976	A	G	SHQ1	intron_variant	MODIFIER	.	G G	0,58	G G	0,42	A G	26,33	A G	19,16	A A	37,0	A G	28,32
chr20	chr20:19411644	19411644	T	A	SHQ1	downstream_gene_variant	MODIFIER	.	A A	0,63	A A	0,56	T A	21,22	T A	25,13	T T	41,0	T A	29,28
chr20	chr20:19457870	19457870	C	A	SHQ1-ENSCAFG00000034227	intergenic_region	MODIFIER	.	A A	0,55	A A	0,41	C A	18,16	C A	25,18	C C	39,0	C A	23,32
chr24	chr24:12420712	12420712	A	G	PAK5	intron_variant	MODIFIER	.	G G	0,38	G G	0,52	A G	30,35	A A	37,0	A G	25,16	A G	26,25
chr24	chr24:12562740	12562740	G	T	PAK5	intron_variant	MODIFIER	.	T T	0,46	T T	0,44	G T	28,14	G G	36,0	G T	18,16	G T	23,20
chr28	chr28:31619297	31619297	T	Tins38	ATE1	intron_variant	MODIFIER	.	Tins38 Tins38	0,3	Tins38 Tins38	1,3	T Tins38	24,4	T Tins38	21,2	T T	42,0	T T	38,0
chr29	chr29:12760114	12760114	T	G	ENSCAFG00000040520-ENSCAFG00000035308	intergenic_region	MODIFIER	.	G G	0,55	G G	0,51	T G	22,15	T G	16,12	T G	23,22	T T	39,0
chr29	chr29:12872182	12872182	T	A	ENSCAFG00000040520-ENSCAFG00000035308	intergenic_region	MODIFIER	.	A A	0,46	A A	0,48	T A	18,23	T A	21,16	T A	17,25	T T	44,0
chr29	chr29:13059977	13059977	C	Cins52	ENSCAFG00000035308-GGH	intergenic_region	MODIFIER	.	Cins52 Cins52	0,10	Cins52 Cins52	0,11	C Cins52	28,7	C Cins52	23,4	C Cins52	22,2	C C	36,0
chr29	chr29:13486711	13486711	G	A	ENSCAFG00000036522	intron_variant	MODIFIER	.	A A	0,57	A A	0,41	G A	22,16	G A	23,25	G A	23,24	G G	39,0
chr29	chr29:13844042	13844042	TGA	T	ENSCAFG00000039333-ENSCAFG00000037534	intergenic_region	MODIFIER	.	T T	0,50	T T	0,36	TGA T	21,21	TGA T	18,24	TGA T	35,20	TGA TGA	45,0
chr29	chr29:13866390	13866390	A	T	ENSCAFG00000037534	downstream_gene_variant	MODIFIER	.	T T	0,65	T T	0,55	A T	22,28	A T	25,25	A T	39,29	A A	38,0
chr29	chr29:13923560	13923560	C	T	ENSCAFG00000035075	intron_variant	MODIFIER	.	T T	0,65	T T	0,46	C T	25,30	C T	20,30	C T	35,23	C C	38,0
chr29	chr29:14822556	14822556	C	T	ENSCAFG00000027917-ENSCAFG00000039776	intergenic_region	MODIFIER	.	T T	0,47	T T	0,35	C T	22,18	C T	16,17	C T	22,21	C C	37,0
chr29	chr29:15170083	15170083	C	T	ENSCAFG00000027236-ARMC1	intergenic_region	MODIFIER	.	T T	1,57	T T	0,31	C T	27,17	C T	7,12	C T	19,16	C C	59,0
chr29	chr29:16351976	16351976	C	CT	SGK3	frameshift_variant	HIGH	p.Glu47fs	CT CT	0,51	CT CT	0,50	C CT	19,24	C CT	20,25	C CT	17,30	C C	41,0
chr29	chr29:17041580	17041580	G	A	CPA6-ENSCAFG00000035818	intergenic_region	MODIFIER	.	A A	0,54	A A	0,40	G A	33,29	G A	34,19	G A	16,20	G G	37,0
chr31	chr31:7529570	7529570	C	Cins43	ENSCAFG00000036204	intron_variant	MODIFIER	.	Cins43 Cins43	0,14	Cins43 Cins43	0,5	C Cins43	18,9	C Cins43	23,4	C Cins43	20,6	C Cins43	36,7
chr31	chr31:38646202	38646202	C	T	FAM207A-ENSCAFG00000034536	intergenic_region	MODIFIER	.	T T	0,45	T T	0,52	C T	18,18	C C	35,0	C C	42,0	C T	22,27
